# Supplementary material for: Physiologic manipulation of microalgae-bacteria consortia: chances and limitations
Source: Research Square preprint supplement (doi:10.21203/rs.3.rs-6410592/v1), 2025-09-16

# Setup of physiological treatments in climate chambers

pH value  
Salinity  
Antibiotics

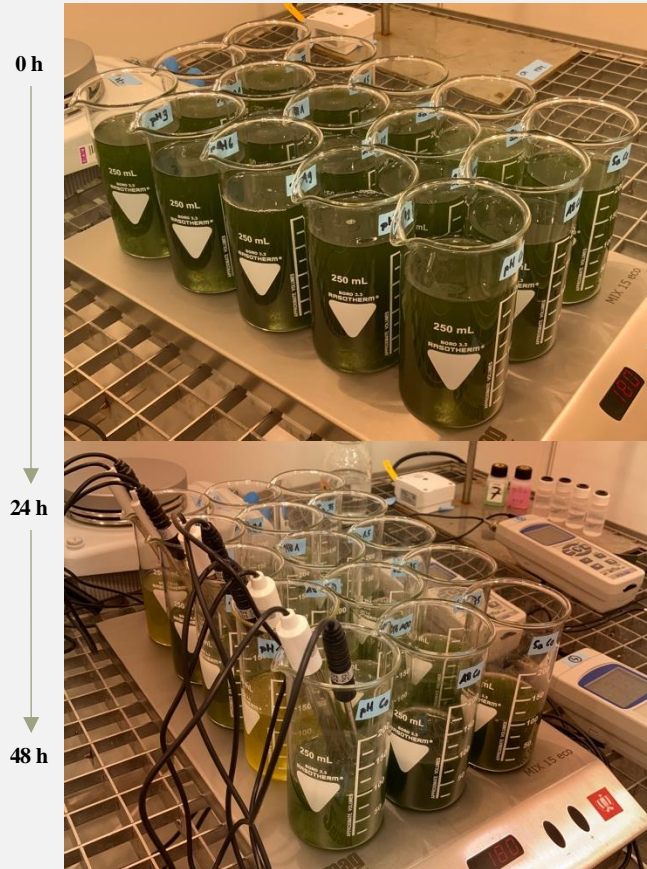

Light Intensity

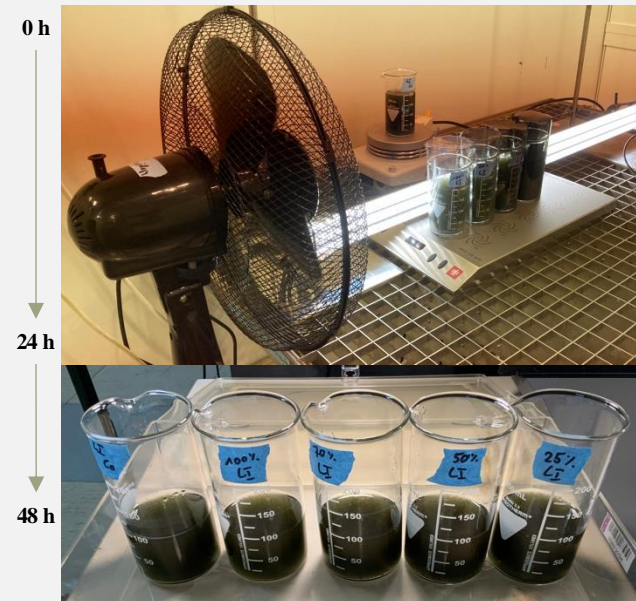

Temperature

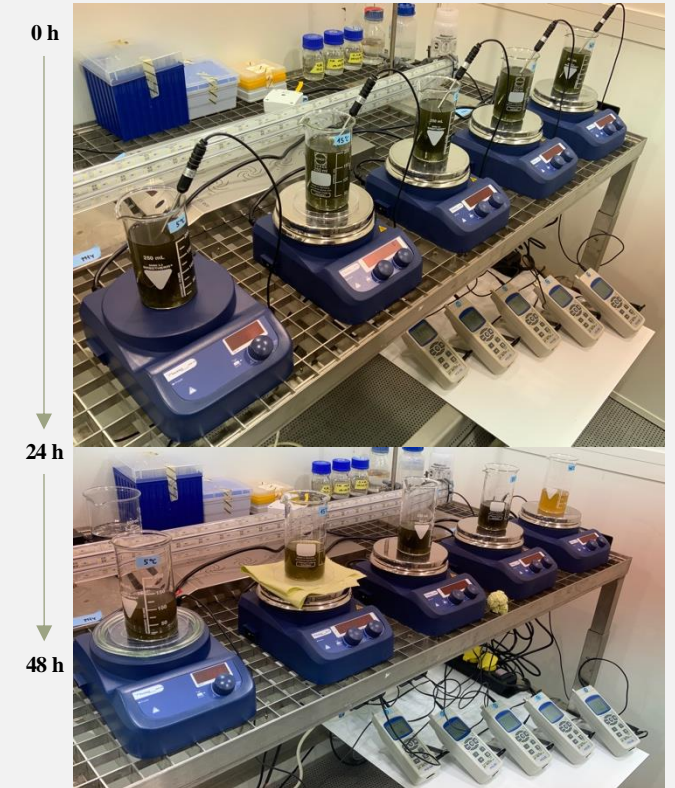

Supplement: Supplementary file 1 [file 92a6e498ade7a34f4930ccac.pdf]
